This publication represents the most complete and comprehensive collection of information available concerning all aspects of this dramatic experimental and therapeutic procedure. Serious problems with this method are presented and discussed, as well as the pressing need to ascertain more fully and accurately its limitations. The ups and downs in enthusiasm for this procedure through the centuries are clearly revealed. Great responsibility for prevention of unscientific development of high pressure therapy is stressed, as well as sane rationale for its employment.

Although in certain aspects of medical practice the apparent value of this method of therapy has been demonstrated, further investigative studies are imperative. Knowledge of hyperbaric oxygen should be of great concern to all physicians, as well as many scientists in allied fields. This book is a rich source of present-day authoritative information on this fascinating subject and should be in every medical and scientific library, as well as in the personal possession of everyone working in, or vitally concerned with, any aspect of this field.

H. M. LIVINGSTONE, M.D.

**Advances in Cardiopulmonary Diseases.** VOLUME II. EDITED BY ANDREW L. BANYAI, M.D., F.C.C.P., Clinical Professor of Medicine, Emeritus, Marquette University School of Medicine, AND BURGESS L. GORDON, M.D., F.C.C.P., Visiting Professor of Medicine, Jefferson Medical College. Cloth. \$12.00. Pp. 347, with 92 Illustrations. Year Book Medical Publishers, Inc., Chicago, 1964.

This second of a series of selected lectures from the 1962 Series of Postgraduate Course presented by the Council on Postgraduate Medical Education of the American College of Chest Physicians is part of a continuing design to present to a medical audience "new information" in early publication. The fact that most of the information is not new, and that the book is published two years after the original presentation in 1962, presents a modest condemnation of the publisher's editorial philosophy. The publisher might more accurately describe the contents as a series of recently presented reviews of existing information on diversified topics somewhat related to cardiopulmonary disease.

Since it is reasonable to assume that the anesthesiologist should have a particular interest in this broad subject, he conceivably will find this volume of more than passing interest, particularly such segments as "The Clinical Diagnosis of Chronic Bronchitis and Pulmonary Emphysema," "Mechanics of Breathing" (which is surprisingly explicit) and "Alveolar Gas Exchange." Whether this interest is worth the purchase price of this volume depends on his capacity to accept dogma on anesthetic practice from an otolaryngologist discussing "Endoscopic Problems in Chest Disease."

J. GERARD CONVERSE, M.D.

**Cardiac Arrest and Resuscitation.** SECOND EDITION. BY HUGH E. STEPHENSON, JR., M.D., F.A.C.S. Prof. of Surgery, University of Missouri School of Medicine, Columbia, Missouri. Cloth. \$15.00. Pp. 501, with 76 figures. The C. V. Mosby Co., St. Louis, 1964.

The first edition of this excellent publication appeared in 1958. This new edition has been rewritten, enlarged and brought up-to-date by the inclusion of salient material from the enormous amount of recent clinical and investigative observations. It has been enhanced by the addition of five more contributors, making a total of twelve in this volume.

The scope of this book extends from material valuable to physicians rarely faced with the need for cardiac resuscitation, to cardiac surgeons contemplating elective cardioplegia. Dr. Stephenson's presentation has been augmented by personal case histories contributed to him by over 700 physicians, located throughout the world. Physiological aspects of the heart and their pathological aberrations are presented. Valuable additions include material pertaining to the use of hypothermia, hyperbaric oxygen, pace-making devices, mechanical devices for direct and indirect cardiac massage, closed-chest defibrillation, closed-chest circulatory augmentation and left ventricular assist pumps. The term "cardiac arrest" is clarified as proper terminology only for sudden acute stoppage of the heart and not for gradual cessation of cardiac contractions. The author has made a noteworthy attempt to digest and evaluate the widespread investigative and clinical material assembled in this publication. Illustrations are well selected and reproduced. The book concludes with the largest up-to-date bibliography on this subject known to this reviewer.

All anesthesiologists and surgeons, as well as physicians and scientific investigators dealing with any aspect of cardiopulmonary physiology or pathology should become familiar with the contents of this most inclusive publication. This book should be in every medical school and hospital library.

H. M. LIVINGSTONE, M.D.

**Law, Medicine, Science—and Justice.** EDITED BY LARRY ALAN BEAR, Prof. of Law and Legal Medicine, The University of Puerto Rico School of Law, Rio Piedras, Puerto Rico, assisted by Brian Parker, Associated Editor in the Forensic Sciences. Cloth. \$14.50. Pp. 636, with illustrations. Charles C Thomas, Springfield, Illinois, 1964.

There are twenty contributors to this book which contains information on the presentation of expert medical evidence in court, legal problems of hospitals, psychiatry and the law, narcotics and the law, the drinking driver and the law, forensic science and the law, and crime laboratory investigative procedures.
